# Supplementary material for: Enforced tethering elongates the cortical endoplasmic reticulum and limits store-operated Ca2+ entry
Source: Oxford University Press journal article supplement (doi:10.1242/jcs.259313), 2022-02-22
Supplement: jcs259313supp.pdf [file jcs259313supp.pdf]

A

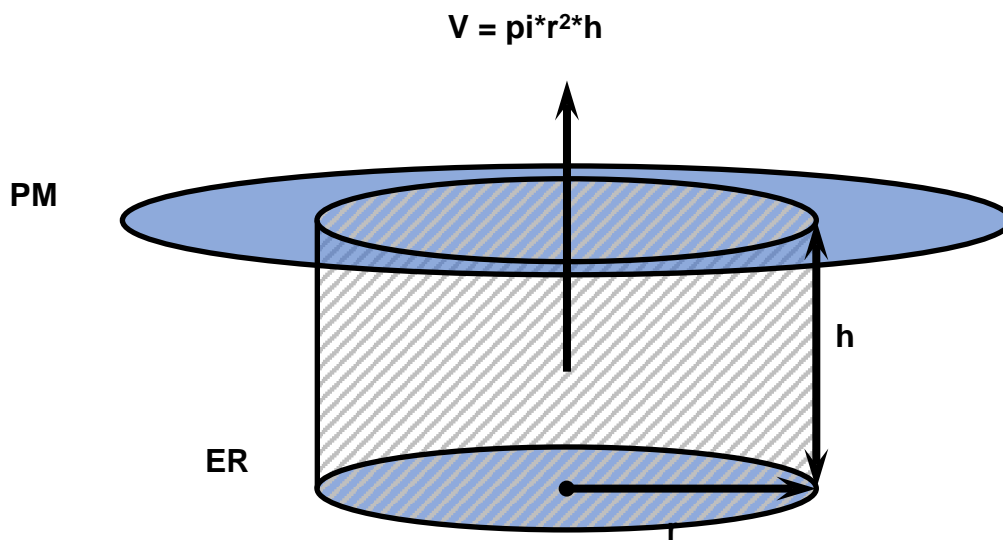

**Fig. S1.** Calculation of ER-PM cleft volume.

Cleft volume was calculated using cER length and gap values assuming a cylindrical shape. V: Volume; r: radius; h; height.

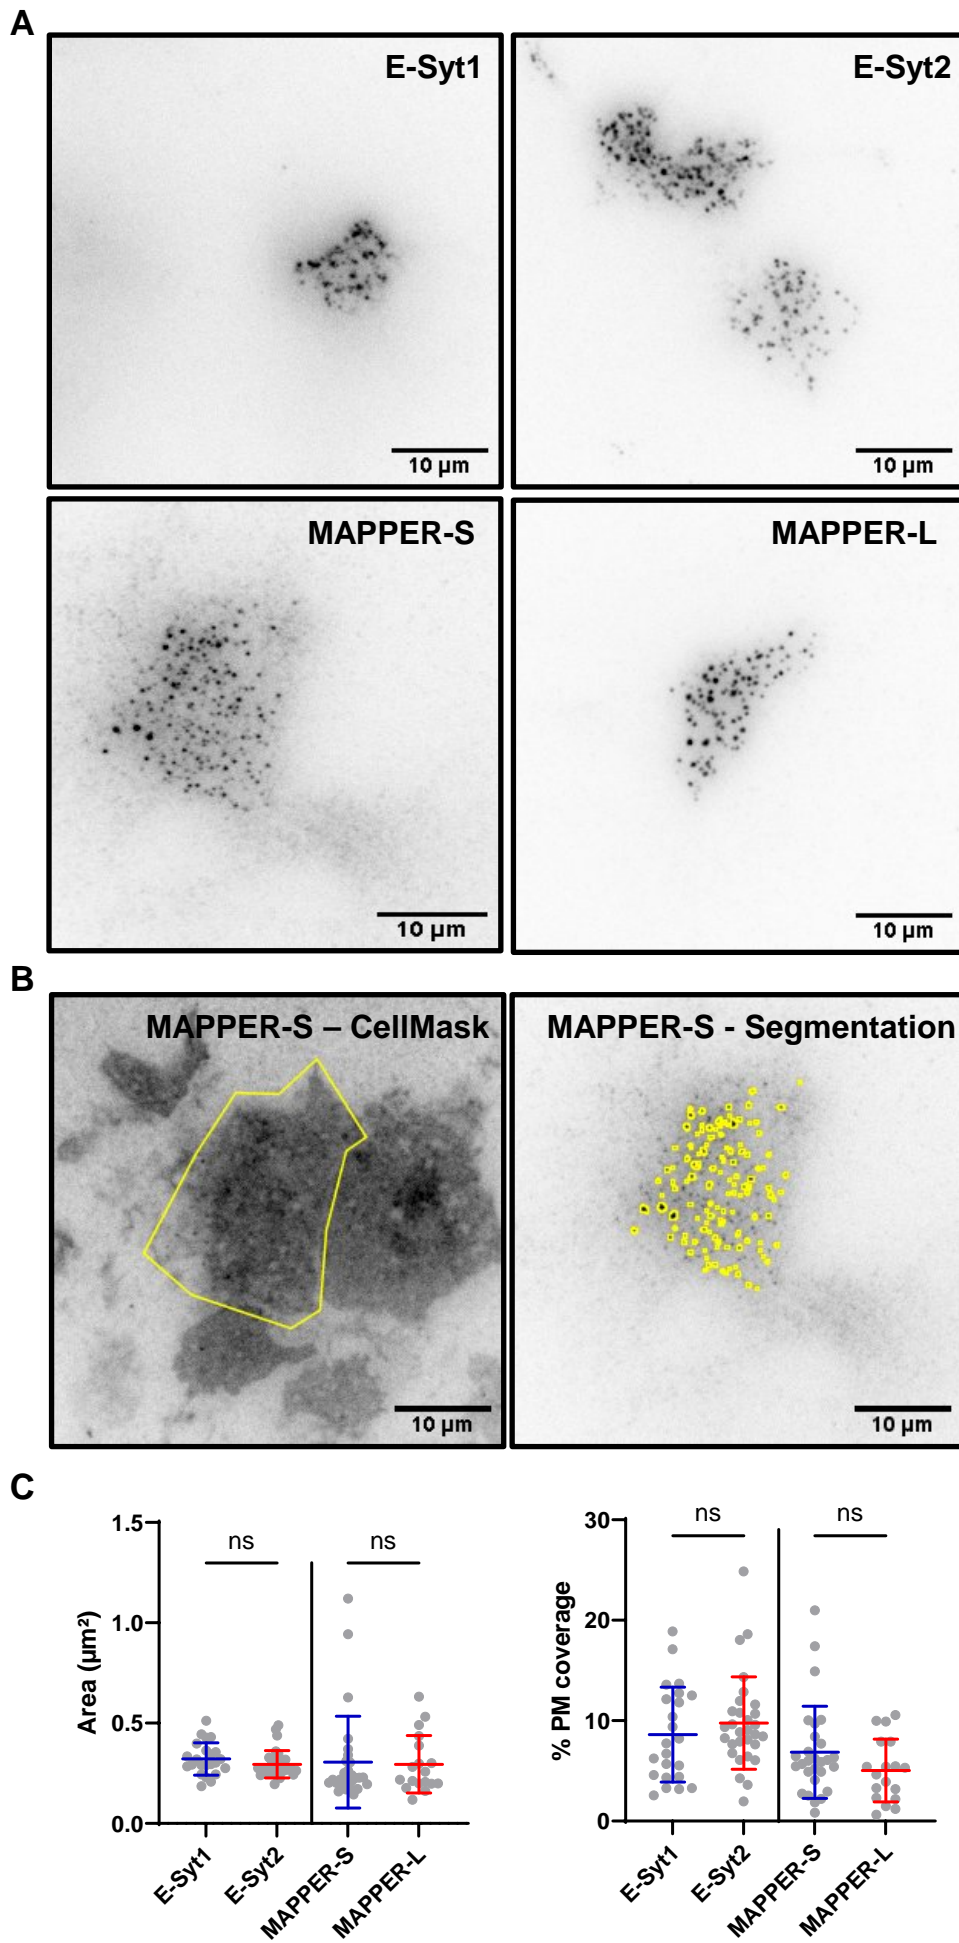

**Fig. S2. E-Syts and MAPPERS populate similar near-PM clusters following store depletion.**

A) Representative TIRF images of HEK-293T cells expressing the indicated GFP-tagged tether proteins. Cell membrane was labelled with CellMask, treated 10 min with 1  $\mu$ M Tg in  $\text{Ca}^{2+}$ -free, and fixed. B) CellMask image of MAPPER-S-expressing cells from A, with the cell border (left) and GFP clusters (right) outlined in yellow. C) Quantification of the cluster area (left) and membrane coverage (right) in cells expressing the different tethers. Data are mean  $\pm$ SEM of (E-Syt1 = 18, E-Syt2 = 30, M-S = 28, M-L = 18 cells) ns: not significant, one-way ANOVA.

**Ctrl**

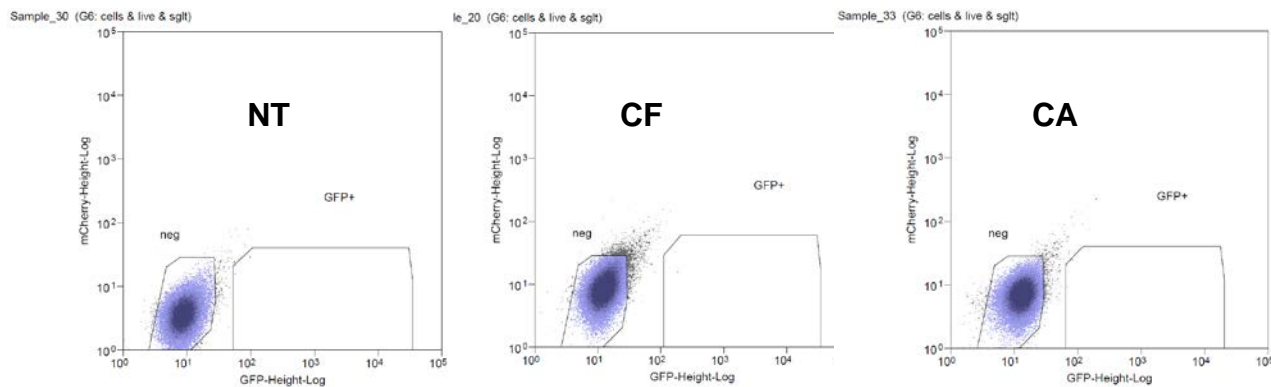

**E-Syt1**

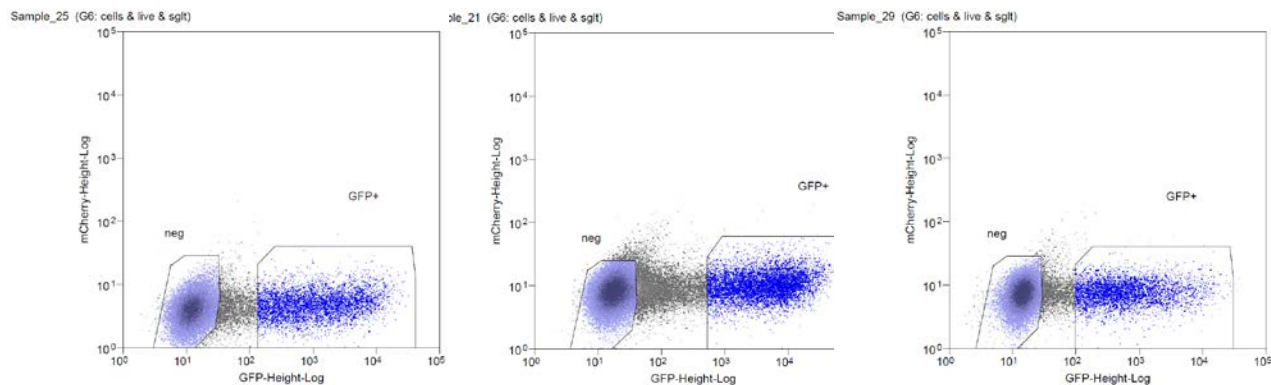

**E-Syt2**

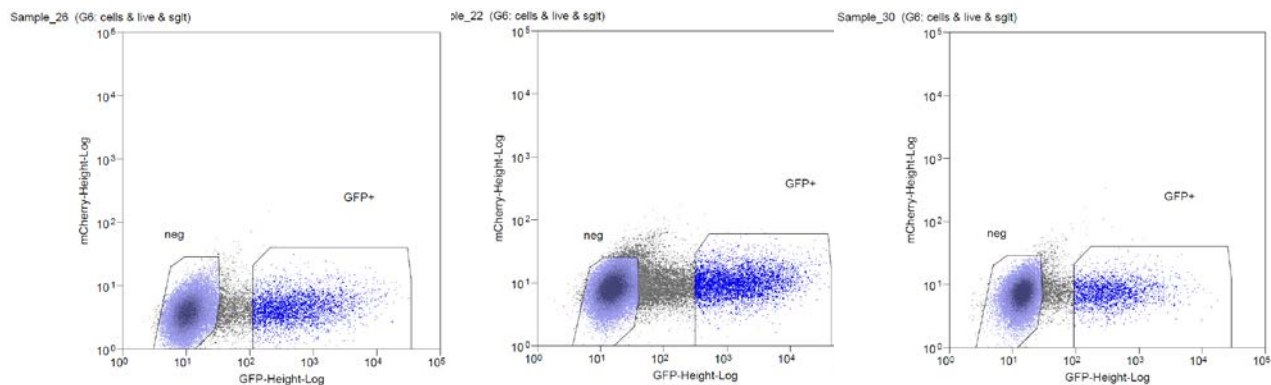

**MAPPER-S**

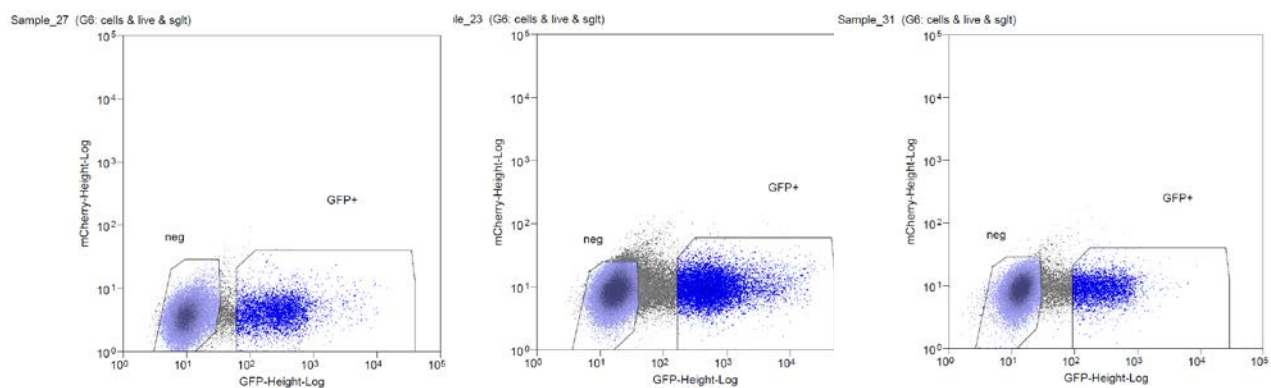

**MAPPER-L**

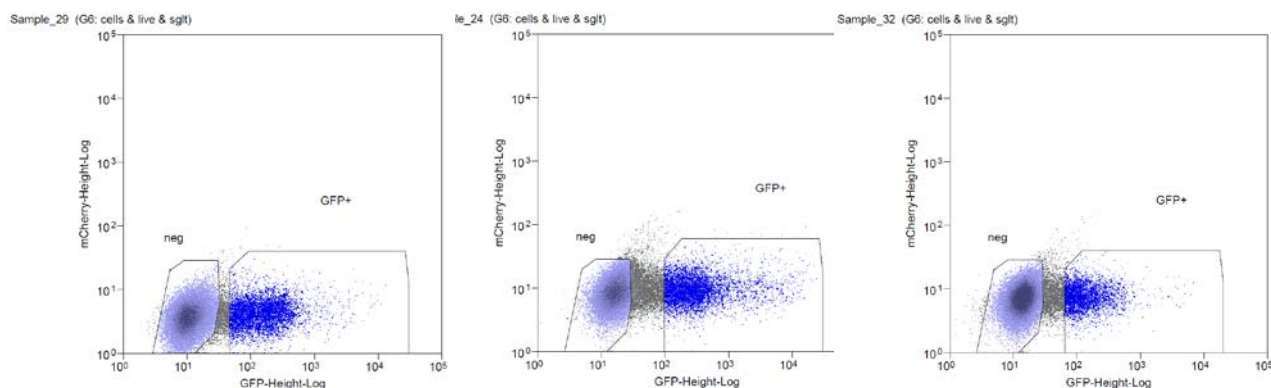

**Fig. S3. Sorting strategy of cells expressing ER-PM tether proteins.**

Cells expressing GFP-tagged E-Syts and MAPPERS were sorted by flow cytometry for similar GFP fluorescence in NT, CF, and CA conditions.

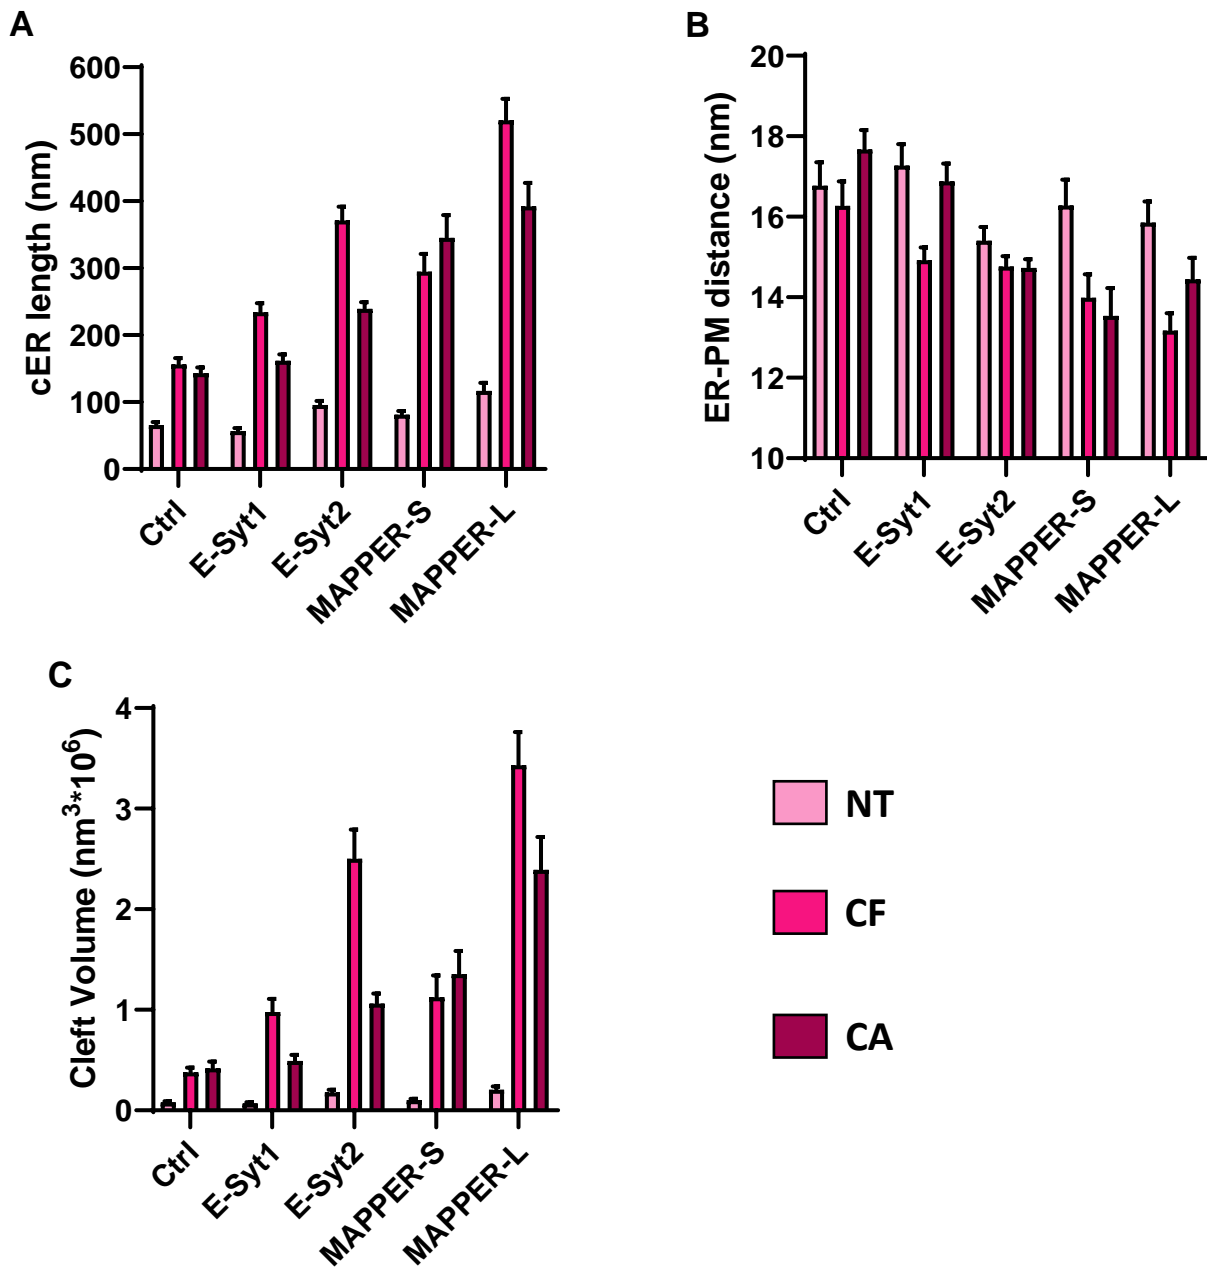

**Fig. S4. E-Syts and MAPPERS expression augments the cER elongation during SOCE.**

A-C) Quantification of the averaged ER-PM gap distance (A), cER length (B) and cleft volume (C) in cells expressing E-Syts and MAPPERS and imaged in NT, CF, and CA conditions. Data are mean±SEM. N numbers are presented on Table and 2.

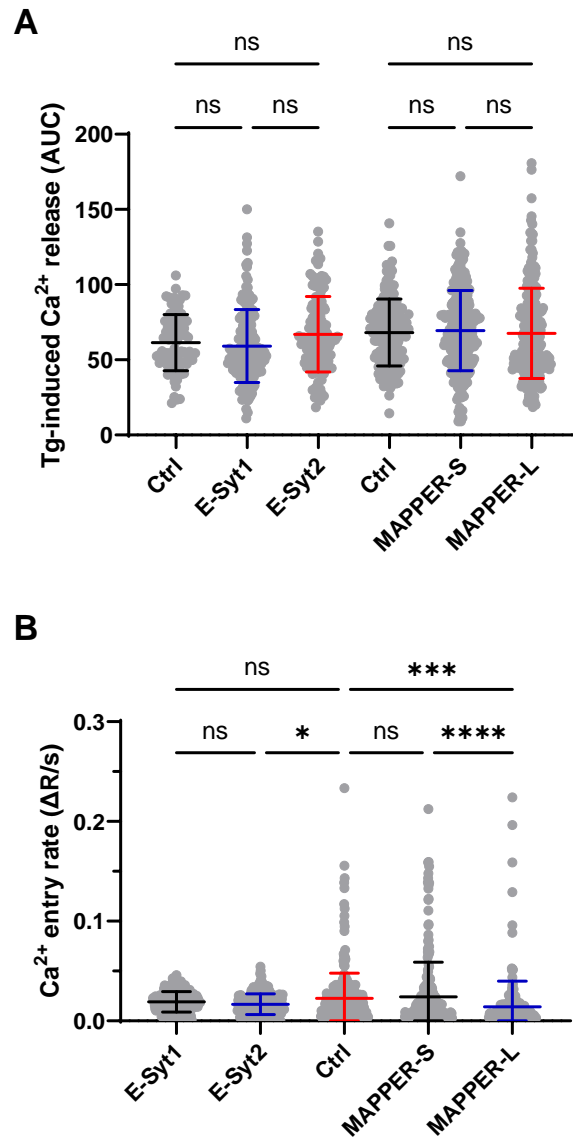

**Fig. S5. E-Syt2 and M APPER-L expression inhibit SOCE but not Ca<sup>2+</sup> release**

A) Quantification of the amount of Ca<sup>2+</sup> released by Tg in Ca<sup>2+</sup>-free medium in cells expressing E-Syts and MAPPERS. Data are mean±SEM of; left to right n = 83, 154, 126, 248, 226 cells. B) Quantification of Ca<sup>2+</sup> entry rate in cells expressing GFP-tagged E-Syts and MAPPERS, sorted by flow cytometry for similar GFP fluorescence. Data are mean±SEM of ; left to right n = 321, 238, 242, 256, 225 cells \*p<0.05, \*\*\*p<0.001, \*\*\*\*p<0.0001, one-way ANOVA.

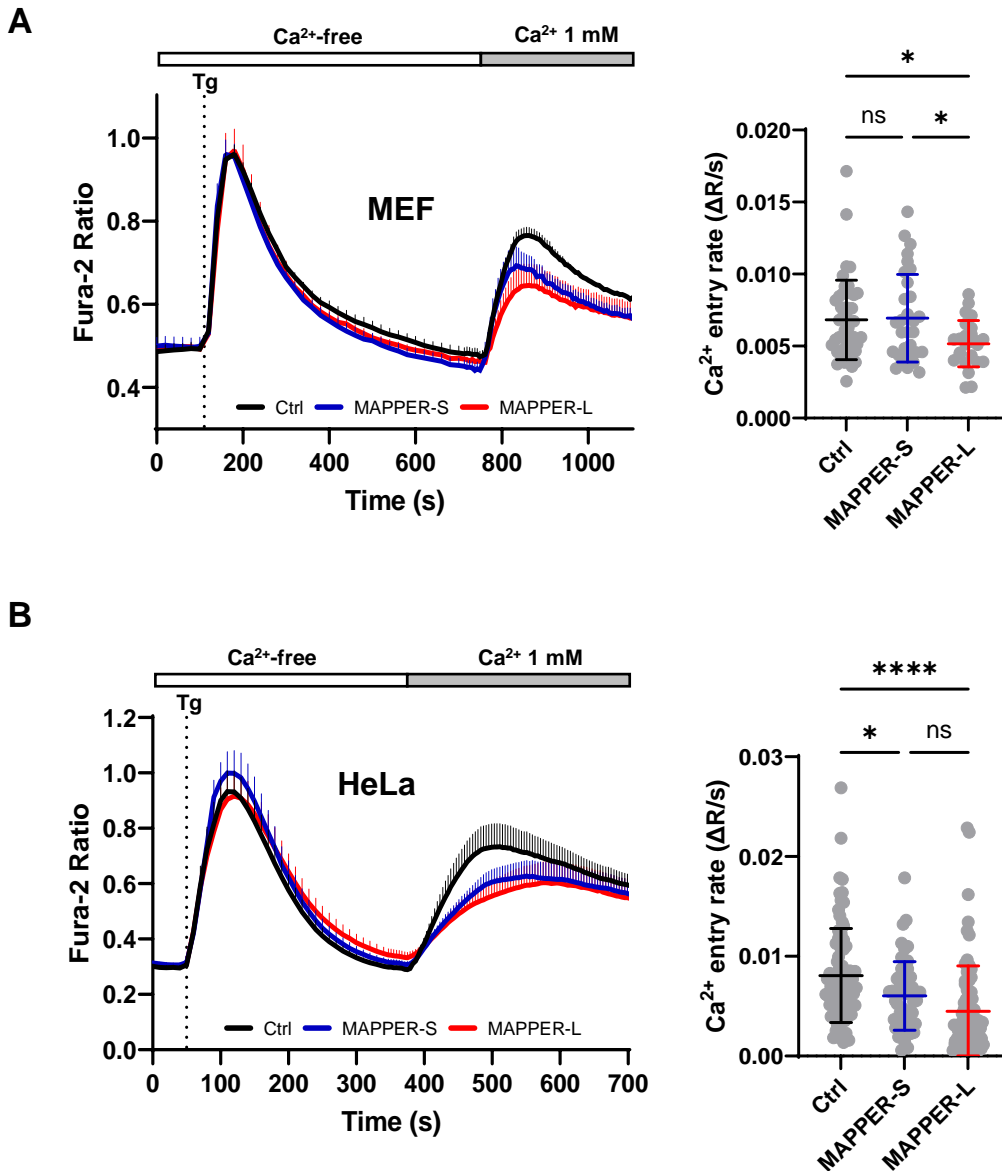

**Fig. S6. Effect of MAPPER expression in MEF and HeLa cells**

Averaged Ca<sup>2+</sup> recordings (left) and Ca<sup>2+</sup> extrusion rates (right) in MEF (A) MAPPER-S (n = 32), MAPPER-L (n = 25) or a control plasmid (n = 47) and HeLa cells (B) expressing MAPPER-S (n = 55), MAPPER-L (n = 75) or a control plasmid (n = 83). \*p<0.05, \*\*\*p<0.001, \*\*\*\*p<0.0001, one-way ANOVA.



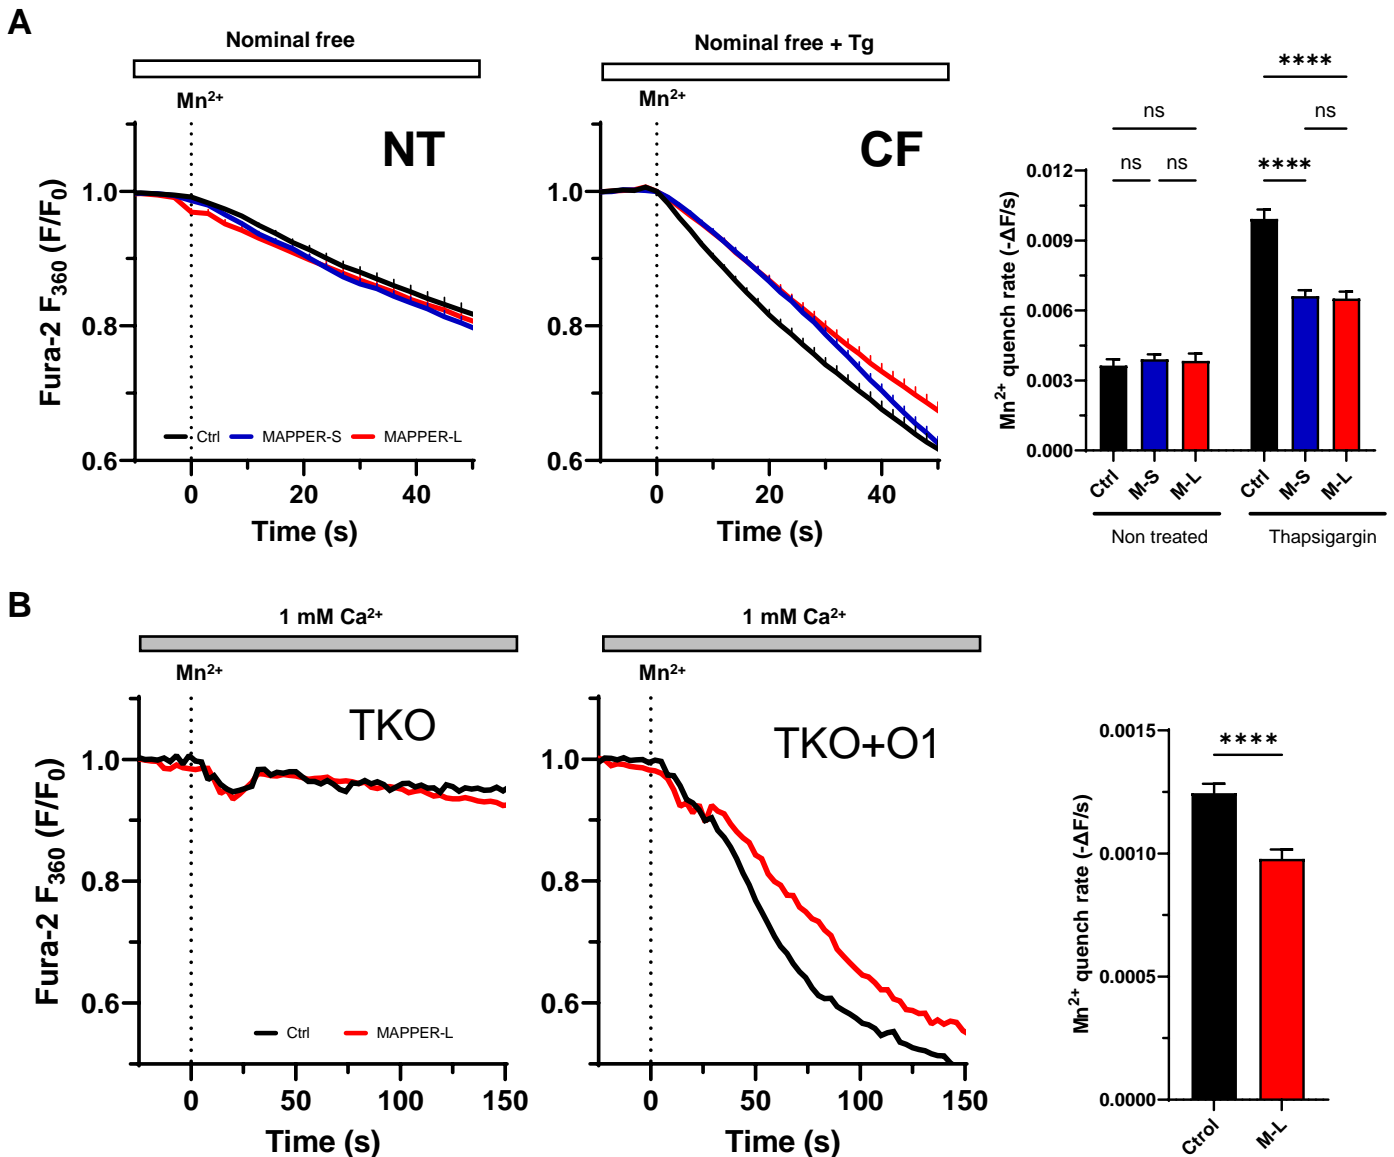

**Fig. S7. MAPPERS expression inhibits store-operated Mn<sup>2+</sup> entry via Orai1.**

A. Averaged Mn<sup>2+</sup> quench recordings in cells expressing MAPPER-S (n = 167), MAPPER-L (n = 169) or a control plasmid (n = 117) before stimulation (Left, NT) and after store depletion (M-S = 193; M-L = 202; Ctrl = 179) (Middle, CF). Recordings were in nominal Ca<sup>2+</sup>-free medium without EGTA to avoid Mn<sup>2+</sup> chelation. Right: Statistical evaluation of the Mn<sup>2+</sup> quenching rates. MAPPERS expression strongly reduced Mn<sup>2+</sup> entry after Ca<sup>2+</sup> readmission. Data are mean±SEM of cells from 5-12 independent recordings. \*p<0.05, \*\*\*p<0.001, \*\*\*\*p<0.0001, one-way ANOVA. B. Representative Mn<sup>2+</sup> quench recordings of ORAI1-3-deficient HEK-293 cells (Triple KO, TKO) expressing the indicated constructs either alone (left) or together with mCh-ORAI1 (middle). Recordings were in 1 mM Ca<sup>2+</sup> readed for 2 min following Tg exposure for 10 min in Ca<sup>2+</sup>-free solution. Right: Statistical evaluation of Mn<sup>2+</sup> quench rates. Data are mean±SEM of 91 (Ctrl) and 66 (M-L) cells from 5-6 independent recordings, \*\*\*\*p<0.0001, Student t test.

**A**

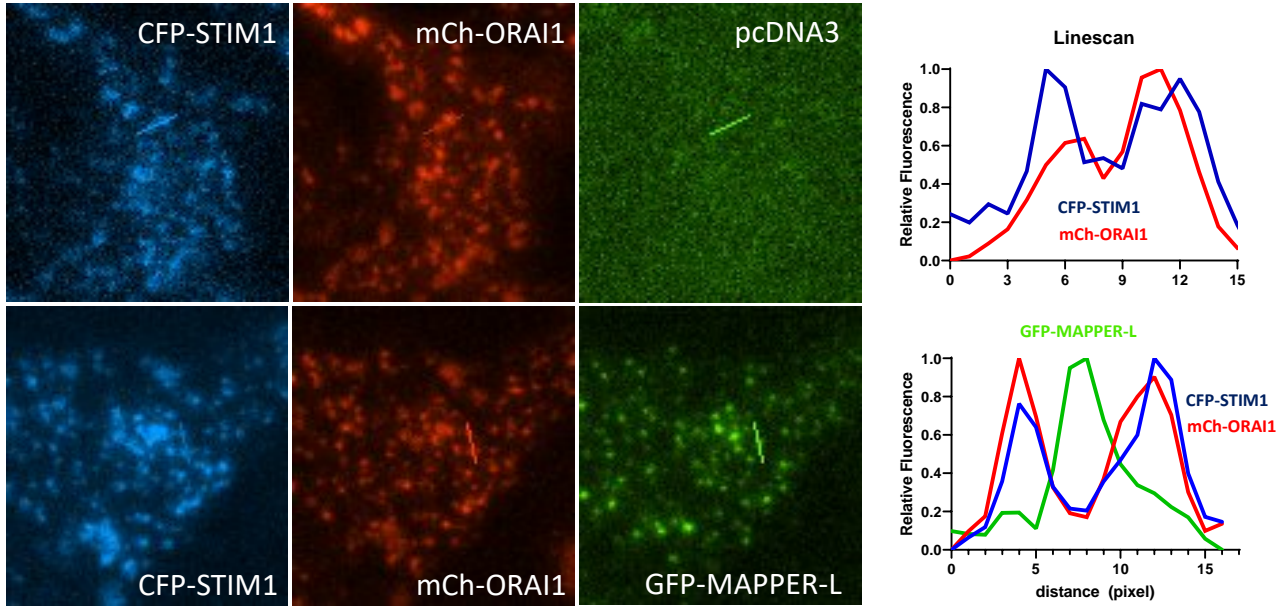

**B**

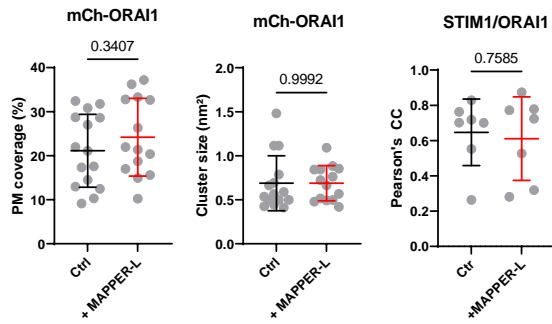

**C**

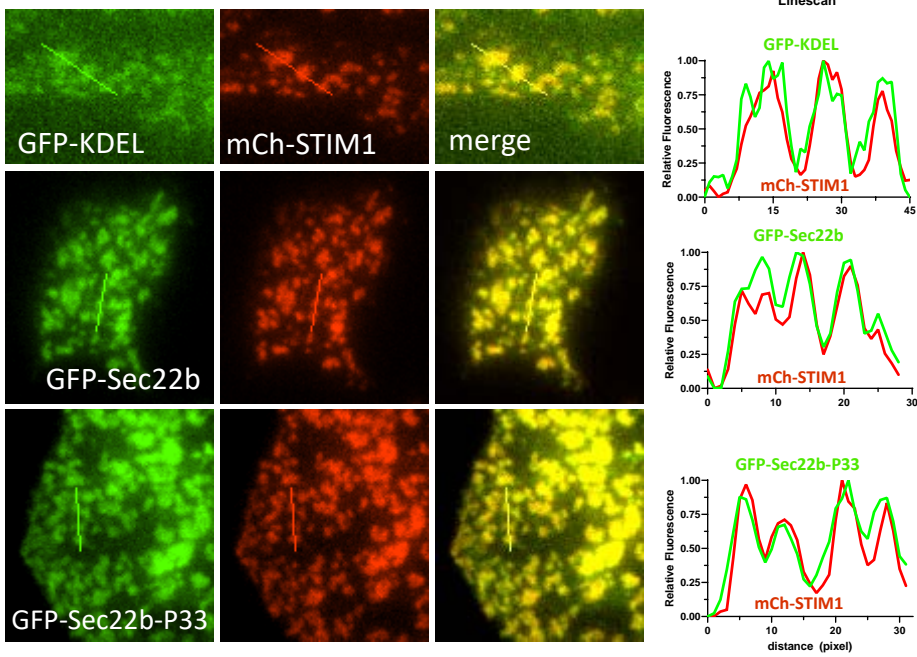

**D**

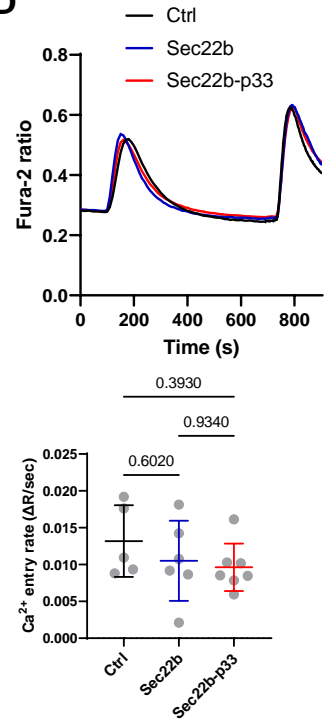

**Fig. S8. MAPPER-L tethers cortical structures juxtaposed to STIM/ORAI interaction sites.**

A. TIRF images of cells co-expressing CFP-STIM1 (cyan) and mCh-Orai1 (red) without (top images) or with (bottom images) GFP-MAPPER-L (green). MAPPER-L expression did not alter the localization of STIM/ORAI clusters. Graphs shows the fluorescence intensity profile along a line (shown on images) drawn across STIM/ORAI and juxtaposed MAPPER-L clusters. Bars: 10  $\mu\text{m}$ . B) Morphometric parameters of mCh-ORAI1 clusters in cells expressing or not GFP-MAPPER-L ( $n = 15$  and  $14$  cells respectively). The fraction of the PM decorated (left), the area of individual clusters (middle), and the Pearson's co-localization coefficients were not altered by the expression of GFP-MAPPER-L. C. TIRF images of cells co-expressing mCh-STIM1 (red) and the indicated GFP-tagged constructs (green). Graphs shows the fluorescence intensity profile along a line (shown on images) drawn across mCh-STIM1 clusters. The ER marker GFP-KDEL, the SNARE protein Sec22b, and its extended version Sec22b-P33 colocalized with mCh-STIM1 clusters. Bars: 10  $\mu\text{m}$ . D. Top: Averaged fura-2 recordings of  $\text{Ca}^{2+}$  elevations evoked by the Tg-readmission protocol in cells expressing Sec22b, Sec22b-P33, or a control plasmid. Bottom: Quantification of  $\text{Ca}^{2+}$  entry rates. Averaged slope from 5 (ctrl) 6 (Sec22b) and 7 (p33) independent experiments.

**Table S1. Quantification of cortical ER parameters**

Epon sections were generated before stimulation (NT), after store depletion (CF), and following Ca<sup>2+</sup> readmission (CA). The total number of contact sites measured is indicated for each condition.

|          | Condition | ER-PM distance (nm) |      | cER length (nm) |       | N   |
|----------|-----------|---------------------|------|-----------------|-------|-----|
|          |           | Mean                | SD   | Mean            | SD    |     |
| Ctrl     | NT        | 16,77               | 6,02 | 65,8            | 45,5  | 105 |
|          | CF        | 16,27               | 5,77 | 156,0           | 92,4  | 89  |
|          | CA        | 17,67               | 5,85 | 143,1           | 106,5 | 146 |
| E-Syt1   | NT        | 17,27               | 5,33 | 56,8            | 42,3  | 100 |
|          | CF        | 14,92               | 4,78 | 234,2           | 206,2 | 226 |
|          | CA        | 16,88               | 5,38 | 161,9           | 115,7 | 149 |
| E-Syt2   | NT        | 15,40               | 4,50 | 95,7            | 79,5  | 167 |
|          | CF        | 14,76               | 3,68 | 371,1           | 290,2 | 194 |
|          | CA        | 14,73               | 4,25 | 239,3           | 198,1 | 402 |
| MAPPER-S | NT        | 16,28               | 6,70 | 81,4            | 57,6  | 110 |
|          | CF        | 13,99               | 6,74 | 294,5           | 309,2 | 133 |
|          | CA        | 13,54               | 7,74 | 345,3           | 384,6 | 127 |
| MAPPER-L | NT        | 15,85               | 6,97 | 116,5           | 161,7 | 175 |
|          | CF        | 13,17               | 6,52 | 520,5           | 485,2 | 223 |
|          | CA        | 14,45               | 6,73 | 392,0           | 447,5 | 162 |

**NT:** Non treated

**CF:** EGTA 1 mM + Tg 10 min

**CA:** EGTA 1 mM + Tg 10 min then Ca<sup>2+</sup> 1 mM for 2 min

**Table S2. Statistical evaluation of cER morphological parameters.**

Cells expressing E-Syts and MAPPERS were imaged in NT, CF, and CA conditions.

\* $p < 0.05$ , \*\* $p < 0.01$ , \*\*\* $p < 0.001$ , \*\*\*\* $p < 0.0001$ , one-way ANOVA.

|          |                       | Tukey's multiple comparisons test | ER-PM distance |                  | MCS length |                  |
|----------|-----------------------|-----------------------------------|----------------|------------------|------------|------------------|
|          |                       |                                   | Summary        | Adjusted P Value | Summary    | Adjusted P Value |
| Ctrl     | NT vs. CF             | ns                                | ns             | 0.8148           | *          | 0.0421           |
|          | NT vs. CA             | ns                                | ns             | 0.432            | ns         | 0.0522           |
|          | CF vs. CA             | ns                                | ns             | 0.1602           | ns         | 0.9275           |
| E-Syt1   | NT vs. CF             | **                                | **             | 0.0017           | ****       | <0,0001          |
|          | NT vs. CA             | ns                                | ns             | 0.8565           | **         | 0.005            |
|          | CF vs. CA             | **                                | **             | 0.0032           | *          | 0.0228           |
| E-Syt2   | NT vs. CF             | ns                                | ns             | 0.5357           | ****       | <0,0001          |
|          | NT vs. CA             | ns                                | ns             | 0.4073           | ****       | <0,0001          |
|          | CF vs. CA             | ns                                | ns             | 0.998            | ****       | <0,0001          |
| MAPPER-S | NT vs. CF             | **                                | **             | 0.0052           | ****       | <0,0001          |
|          | NT vs. CA             | ***                               | ***            | 0.0007           | ****       | <0,0001          |
|          | CF vs. CA             | ns                                | ns             | 0.7995           | ns         | 0.2558           |
| MAPPER-L | NT vs. CF             | ****                              | ****           | <0,0001          | ****       | <0,0001          |
|          | NT vs. CA             | ns                                | ns             | 0.0623           | ****       | <0,0001          |
|          | CF vs. CA             | ns                                | ns             | 0.075            | ****       | <0,0001          |
| NT       | Ctrl vs. E-Syt1       | ns                                | ns             | 0.9705           | ns         | 0.9992           |
|          | Ctrl vs. E-Syt2       | ns                                | ns             | 0.3000           | ns         | 0.8876           |
|          | E-Syt1 vs. E-Syt2     | ns                                | ns             | 0.0709           | ns         | 0.7613           |
|          | Ctrl vs. MAPPER-S     | ns                                | ns             | 0.9701           | ns         | 0.9921           |
|          | Ctrl vs. MAPPER-L     | ns                                | ns             | 0.6852           | ns         | 0.5083           |
|          | MAPPER-S vs. MAPPER-L | ns                                | ns             | 0.9718           | ns         | 0.8010           |
| CF       | Ctrl vs. E-Syt1       | ns                                | ns             | 0.3199           | ns         | 0.1137           |
|          | Ctrl vs. E-Syt2       | ns                                | ns             | 0.2323           | ****       | <0,0001          |
|          | E-Syt1 vs. E-Syt2     | ns                                | ns             | 0.9985           | ****       | <0,0001          |
|          | Ctrl vs. MAPPER-S     | *                                 | *              | 0.0286           | ***        | 0.0010           |
|          | Ctrl vs. MAPPER-L     | ***                               | ***            | 0.0001           | ****       | <0,0001          |
|          | MAPPER-S vs. MAPPER-L | ns                                | ns             | 0.6818           | ****       | <0,0001          |
| CA       | Ctrl vs. E-Syt1       | ns                                | ns             | 0.7560           | ns         | 0.9716           |
|          | Ctrl vs. E-Syt2       | ****                              | ****           | <0,0001          | **         | 0.0012           |
|          | E-Syt1 vs. E-Syt2     | ***                               | ***            | 0.0008           | *          | 0.0163           |
|          | Ctrl vs. MAPPER-S     | ****                              | ****           | <0,0001          | ****       | <0,0001          |
|          | Ctrl vs. MAPPER-L     | ****                              | ****           | <0,0001          | ****       | <0,0001          |
|          | MAPPER-S vs. MAPPER-L | ns                                | ns             | 0.6603           | ns         | 0.5510           |

NT: Non treated

CF: EGTA 1 mM + Tg 10 min

CA: EGTA 1 mM + Tg 10 min then Ca<sup>2+</sup> 1 mM for 2 min
